# Supplementary material
Source: Elsevier journal article supplement (https://www.sciencedirect.com/science/article/pii/S0213911115000072)
Supplement: mmc1 [file S0213911115000072:mmc1.docx]

**Anexo. Material *online***

**Figura I.** Tendencia en la frecuencia de consumo semanal o diario de cerveza en la población adolescente escolarizada española en 2002, 2006 y 2010, diferenciando por sexo y edad.

**Figura II.** Tendencia en la frecuencia de consumo semanal o diario de vino en la población adolescente escolarizada española en 2002, 2006 y 2010, diferenciando por sexo y edad.

**Figura III.** Tendencia en el consumo semanal o diario de licores en la población adolescente escolarizada española en 2002, 2006 y 2010, diferenciando por sexo y edad.
